# Supplementary material
Source: publisher figshare collection journal article supplement (https://acs.figshare.com/ndownloader/files/4204138)
Supplement: Supplementary file 1 [file 4204138]

## SUPPORTING INFORMATION

### Spectrometric Study of AOT-Hydrolysis Reaction in Water/AOT/Isooctane

#### Microemulsions Using Phenolphthalein as a Chemical Probe

Shiyan Mao, Zhiyun Chen, Dashuang Fan, Xueqin An, and Weiguo Shen

<sup>†</sup>Department of Chemistry, Lanzhou University, Lanzhou, Gansu, 730000, China

<sup>‡</sup>School of Chemistry and Molecular Engineering, East China University of Science and Technology, Shanghai, 200237, China

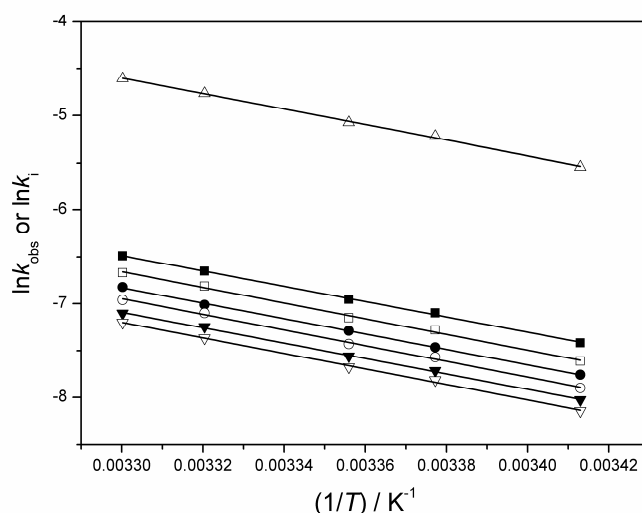

**Figure S-1.** Plots of  $\ln k_{\text{obs}}$  or  $\ln k_i$  vs  $1/T$  for the alkaline hydrolysis of AOT in water/AOT/isooctane microemulsions with various  $\omega$  and  $[\text{AOT}] = 0.4 \text{ mol L}^{-1}$ . The points represent experimental results; for  $\ln k_{\text{obs}}$ : (■)  $\omega = 8$ , (□)  $\omega = 10$ , (●)  $\omega = 12$ , (○)  $\omega = 14$ , (▼)  $\omega = 16$ , (▽)  $\omega = 18$ ; for  $\ln k_i$ : (△). The solid lines represent the results of the fits of eq 16 (see manuscript).

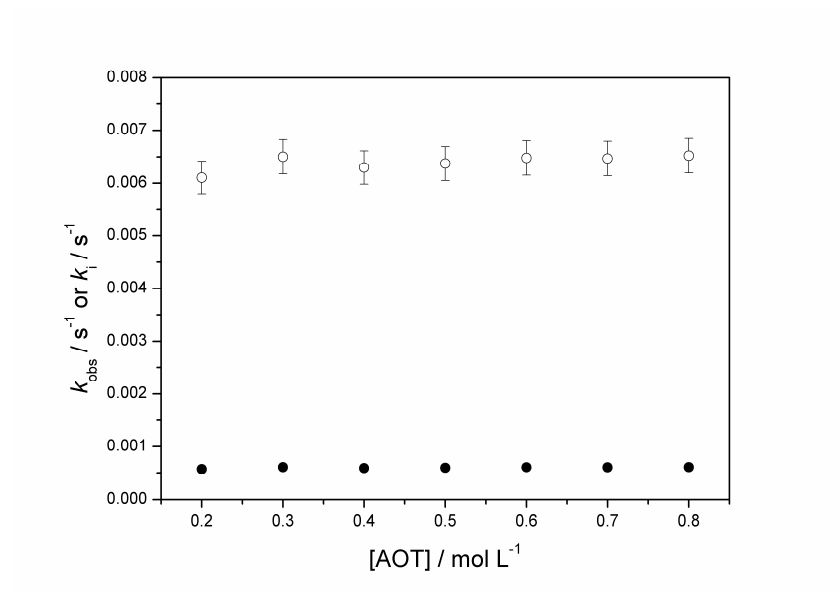

**Figure S-2.** Plots of  $k_{\text{obs}}$  and  $k_i$  vs  $[\text{AOT}]$  for the alkaline hydrolysis of AOT in water/AOT/isooctane microemulsions with  $\omega = 14$  at 298.2 K: (○)  $k_i$  and (●)  $k_{\text{obs}}$ .
